# Supplementary material for: Leptosphaeria maculans-Brassica napus Battle: A Comparison of Incompatible vs. Compatible Interactions Using Dual RNASeq
Source: MDPI journal article supplement (doi:10.3390/ijms23073964), 2022-04-02
Supplement: s1 [file s1]

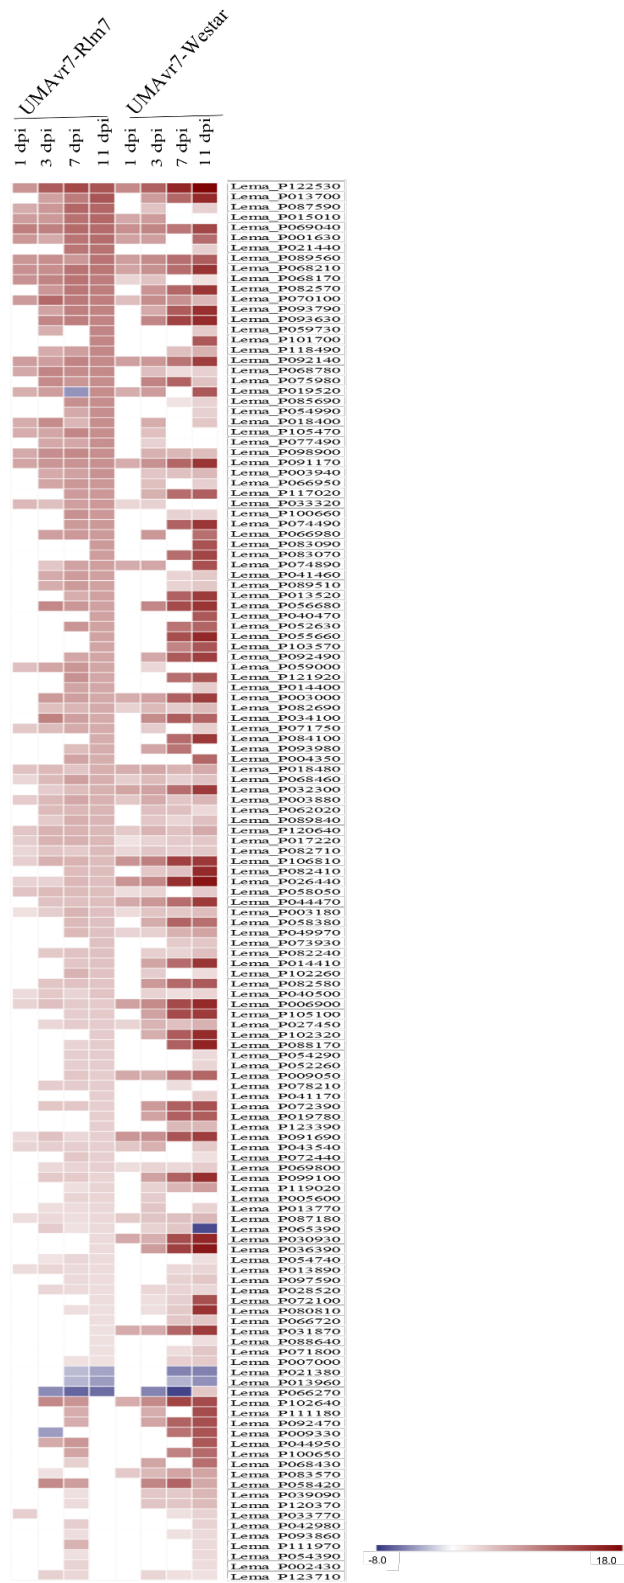

**Supplementary Figure S1:** Differentially expressed Cazyme genes of *Leptosphaeria maculans* isolates, UMAvr7 and umavr7 in planta of Rlm7. Differentially expressed Cazymes genes of

UMAvr7 and umavr7 isolates *in planta* of Rlm7 at 1, 3-, 7-, and 11- dpi compared to zero dpi. Logarithm of absolute value of fold change cutoff ( $\log_{2}FC \geq 2$  and  $\leq -2$ ) with false discovery rate (FDR)  $\leq 0.05$  were considered.

**Supplementary Table S1:** Differentially expressed genes (DEGs) in UMAvr7 compared to umavr7 in Axenic culture. UMAvr7 isolate showed 114 DEGs compared to umavr7 in in vitro with expression log of absolute value of fold change cutoff (logFC)  $\geq 2$  and false discovery rate (FDR)  $\leq 0.05$  were considered.

| Gene locus   | Log2 Fold Change | FDR p-value correction |
|--------------|------------------|------------------------|
| Lema_P001940 | 9.51             | 4.0979E-295            |
| Lema_P001950 | 8.90             | 1.5584E-111            |
| Lema_P001960 | 5.86             | 1.1446E-169            |
| Lema_P113300 | 4.86             | 1.41803E-98            |
| Lema_P007210 | 4.84             | 1.9681E-113            |
| Lema_P105290 | 4.71             | 2.2307E-142            |
| Lema_P004820 | 4.67             | 3.05714E-53            |
| Lema_P020960 | 4.50             | 2.94213E-88            |
| Lema_P019630 | 4.20             | 2.43506E-73            |
| Lema_P019640 | 4.14             | 1.17187E-77            |
| Lema_P105280 | 3.96             | 2.95928E-55            |
| Lema_P029920 | 3.93             | 7.1182E-198            |
| Lema_P109850 | 3.93             | 5.4742E-129            |
| Lema_P048740 | 3.92             | 0.049309236            |
| Lema_P110640 | 3.80             | 6.9109E-106            |
| Lema_P002480 | 3.67             | 2.27949E-60            |
| Lema_P116240 | 3.64             | 1.37115E-50            |
| Lema_P051470 | 3.62             | 8.47278E-81            |
| Lema_P124100 | 3.53             | 2.96317E-83            |
| Lema_P005170 | 3.53             | 0.049309236            |
| Lema_P116170 | 3.53             | 6.17969E-55            |
| Lema_P067150 | 3.49             | 2.91884E-75            |
| Lema_P116460 | 3.42             | 1.02742E-51            |
| Lema_P051480 | 3.34             | 1.325E-100             |
| Lema_P118290 | 3.33             | 4.39695E-83            |

|              |      |             |
|--------------|------|-------------|
| Lema_P112380 | 3.27 | 3.1833E-117 |
| Lema_P004780 | 3.25 | 3.11884E-43 |
| Lema_P006920 | 3.24 | 5.5316E-113 |
| Lema_P060030 | 3.21 | 5.0406E-53  |
| Lema_P073150 | 3.20 | 4.1134E-199 |
| Lema_P016760 | 3.20 | 1.15427E-84 |
| Lema_P074180 | 3.17 | 1.71756E-63 |
| Lema_P115080 | 3.16 | 1.351E-109  |
| Lema_P114820 | 3.10 | 2.1175E-55  |
| Lema_P087320 | 3.04 | 1.02126E-48 |
| Lema_P067600 | 3.01 | 3.8603E-111 |
| Lema_P048340 | 3.00 | 1.86522E-96 |
| Lema_P087800 | 3.00 | 1.05706E-90 |
| Lema_P016030 | 2.98 | 3.19255E-47 |
| Lema_P083420 | 2.95 | 6.32777E-82 |
| Lema_P087810 | 2.95 | 1.86099E-84 |
| Lema_P116190 | 2.95 | 8.4746E-55  |
| Lema_P032080 | 2.92 | 6.22955E-93 |
| Lema_P021040 | 2.89 | 2.1056E-99  |
| Lema_P022070 | 2.87 | 3.75511E-94 |
| Lema_P110690 | 2.84 | 9.1801E-131 |
| Lema_P057900 | 2.82 | 1.0829E-103 |
| Lema_P034940 | 2.78 | 2.20628E-79 |
| Lema_P077070 | 2.77 | 7.05183E-61 |
| Lema_P093520 | 2.72 | 1.85349E-62 |
| Lema_P103220 | 2.69 | 8.15585E-43 |
| Lema_P078930 | 2.67 | 8.47748E-87 |
| Lema_P010440 | 2.67 | 9.55827E-46 |
| Lema_P002320 | 2.66 | 2.31015E-64 |
| Lema_P039910 | 2.63 | 0           |

|              |      |             |
|--------------|------|-------------|
| Lema_P063620 | 2.55 | 9.2406E-128 |
| Lema_P113070 | 2.49 | 0           |
| Lema_P113100 | 2.48 | 0           |
| Lema_P063060 | 2.48 | 3.2019E-101 |
| Lema_P034930 | 2.47 | 2.3298E-71  |
| Lema_P087610 | 2.45 | 1.29016E-93 |
| Lema_P009910 | 2.45 | 5.4094E-107 |
| Lema_P001850 | 2.44 | 0           |
| Lema_P004530 | 2.44 | 2.23944E-57 |
| Lema_P113090 | 2.43 | 0           |
| Lema_P010470 | 2.42 | 0           |
| Lema_P060020 | 2.38 | 1.83867E-93 |
| Lema_P099810 | 2.37 | 4.9907E-119 |
| Lema_P012380 | 2.35 | 3.73618E-44 |
| Lema_P039000 | 2.30 | 2.99357E-47 |
| Lema_P059260 | 2.27 | 1.93156E-43 |
| Lema_P113130 | 2.25 | 0           |
| Lema_P056470 | 2.25 | 1.13524E-42 |
| Lema_P073380 | 2.25 | 2.34446E-81 |
| Lema_P113120 | 2.23 | 0           |
| Lema_P104820 | 2.22 | 2.3496E-67  |
| Lema_P066320 | 2.18 | 9.78125E-60 |
| Lema_P113110 | 2.15 | 0           |
| Lema_P021830 | 2.12 | 6.94102E-46 |
| Lema_P037530 | 2.06 | 0           |
| Lema_P025430 | 2.06 | 0           |
| Lema_P011200 | 2.05 | 3.1841E-89  |
| Lema_P093680 | 2.03 | 1.15947E-62 |
| Lema_P023990 | 2.02 | 0           |
| Lema_P116780 | 2.01 | 1.13524E-42 |
